# Supplementary material
Source: PubMed Central journal article supplement (PMC5073817)
Supplement: NIHMS820346-supplement-Supplemental.pdf [file NIHMS820346-supplement-Supplemental.pdf]

**Supplemental Figure 1. VU0418506 does not induce deficits in rotarod performance at doses up to 100 mg/kg.** Increasing doses of VU0418506 were administered orally to rats and their performance in a rotarod task was assessed as described in Materials and Methods. Data represent Mean $\pm$ SEM from 12-15 animals.

**Supplemental Figure 2. The CODA-RET signal is specific to the complemented pair. mGlu<sub>2</sub> was labeled with either the L1 fragment of luciferase or the L2 fragment.** These constructs were transfected together and stimulated with the group II orthosteric agonist DCG-IV and a BRET signal was measured (black symbols). Co-transfection of unlabeled mGlu<sub>4</sub> did not change the DCG-IV response (gray symbols). Stimulation with the group III orthosteric agonist L-AP4 also did not induce a response (white symbols), indicating that activation is only read out if a receptor is complemented, and demonstrating that there is no contamination of the response by higher order complexes. Data represent three independent determinations performed in triplicate.

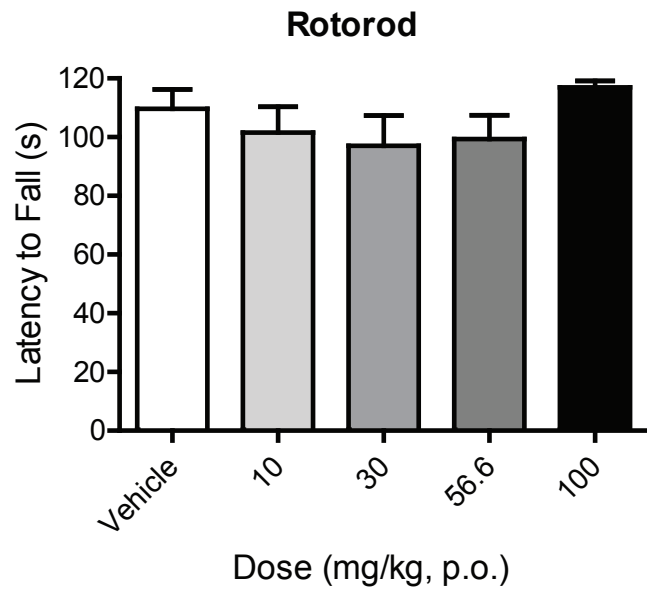

Supplemental Figure 1

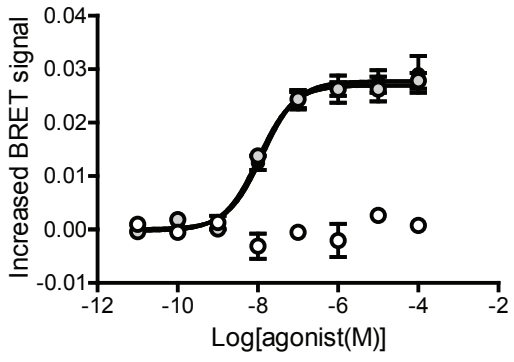

| Receptors                                                       | Agonists |
|-----------------------------------------------------------------|----------|
| ● mGlu <sub>2</sub> _L1+mGlu <sub>2</sub> _L2                   | DCG IV   |
| ○ mGlu <sub>2</sub> _L1+mGlu <sub>2</sub> _L2+mGlu <sub>4</sub> | DCG IV   |
| ○ mGlu <sub>2</sub> _L1+mGlu <sub>2</sub> _L2+mGlu <sub>4</sub> | L-AP4    |

Supp Figure 2
